# Supplementary material for: Changes in Processing Speed, Cognitive Flexibility, and Selective Attention over a Four-Week Treatment Period in Inpatients with Moderate to Severe Depression
Source: Atypon-hosted journal article supplement (doi:10.1024/1016-264x/a000330), 2021-08-26
Supplement: 1016-264X_a000330_esm1.pdf [file 1016-264X_a000330_esm1.pdf]

## Electronic supplementary material

**ESM 1.** Depressive symptoms and mean performances on neuropsychological measures at pre and post of patients with at least one comorbid anxiety disorder versus those without

|                                          | Pre                                               |                                                    | Statistics, pre, and between-group <i>t</i> -tests | Post                                              |                                                    | Statistics, post, between-group <i>t</i> -tests, and repeated measures ANCOVAs                                   |
|------------------------------------------|---------------------------------------------------|----------------------------------------------------|----------------------------------------------------|---------------------------------------------------|----------------------------------------------------|------------------------------------------------------------------------------------------------------------------|
|                                          | MDD<br>( <i>n</i> = 23)<br><i>M</i> ( <i>SD</i> ) | MDDA<br>( <i>n</i> = 22)<br><i>M</i> ( <i>SD</i> ) |                                                    | MDD<br>( <i>n</i> = 23)<br><i>M</i> ( <i>SD</i> ) | MDDA<br>( <i>n</i> = 22)<br><i>M</i> ( <i>SD</i> ) |                                                                                                                  |
| <i>Depression</i>                        |                                                   |                                                    |                                                    |                                                   |                                                    |                                                                                                                  |
| HDRS                                     | 19.26<br>(4.84)                                   | 22.50<br>(6.67)                                    | $t(38.19) = 1.87, p = .07, d = 0.56$               | 8.83<br>(7.09)                                    | 10.59<br>(7.89)                                    | $t(43) = 0.79, p = .43, d = 0.24$                                                                                |
| BDI                                      | 22.22<br>(5.70)                                   | 26.55<br>(9.78)                                    | $t(33.47) = 1.83, p = .08, d = 0.54$               | 12.48<br>(9.05)                                   | 15.65<br>(9.72)                                    | $t(43) = 1.13, p = .26, d = 0.34$                                                                                |
| <i>Neuropsychological measures</i>       |                                                   |                                                    |                                                    |                                                   |                                                    |                                                                                                                  |
| Test d2, concentration performance index | 160.04<br>(40.82)                                 | 166.52 <sup>a</sup><br>(47.24)                     |                                                    | 189.48<br>(45.99)                                 | 185.29<br>(54.81)                                  | Group: $p = .70, \eta_p^2 < .001$<br>Time: $p < .001, \eta_p^2 = .26$<br>Group x Time: $p = .09, \eta_p^2 = .07$ |
| Trail Making Test A, sec.                | 30.64<br>(17.39)                                  | 25.78<br>(11.65)                                   |                                                    | 22.00<br>(7.28)                                   | 23.73<br>(10.43)                                   | Group: $p = .22, \eta_p^2 = .04$<br>Time: $p = .35, \eta_p^2 = .02$<br>Group x Time: $p = .017, \eta_p^2 = .13$  |
| Trail Making Test B, sec.                | 75.70<br>(35.64)                                  | 69.78 <sup>a</sup><br>(35.72)                      |                                                    | 56.61<br>(25.65)                                  | 56.20<br>(27.89)                                   | Group: $p = .45, \eta_p^2 = .01$<br>Time: $p = .36, \eta_p^2 = .02$<br>Group x Time: $p = .40, \eta_p^2 = .02$   |

*Note.* MDD = depression without comorbid anxiety; MMDA = depression with comorbid anxiety; HDRS = Hamilton Rating Scale for Depression; BDI = Beck Depression Inventory; <sup>a</sup> *n* = 21.
